# Supplementary material for: A Modified Constitutive Model for Isotropic Hyperelastic Polymeric Materials and Its Parameter Identification
Source: MDPI journal article supplement (doi:10.3390/polym15153172), 2023-07-26
Supplement: s1 [file s1]

# Supporting Information

## A modified constitutive model for isotropic hyperelastic polymeric materials and its parameter identification

Wei Wang • Yang Liu\* • Zongwu Xie

**Table S1** The experimental data for natural unfilled vulcanized rubber from Treloar [24].

| Uniaxial tension |        | Equal-biaxial tension |        | Pure shear |        |
|------------------|--------|-----------------------|--------|------------|--------|
| $\lambda$        | T/MPa  | $\lambda$             | T/MPa  | $\lambda$  | T/MPa  |
| 1.0000           | 0.0000 | 1.0000                | 0.0000 | 1.0000     | 0.0000 |
| 1.1151           | 0.1135 | 1.0270                | 0.0926 | 1.0865     | 0.0992 |
| 1.2302           | 0.1987 | 1.0650                | 0.1566 | 1.1514     | 0.1839 |
| 1.3646           | 0.2839 | 1.1150                | 0.2371 | 1.2739     | 0.2744 |
| 1.5951           | 0.3785 | 1.1400                | 0.2570 | 1.4036     | 0.3649 |
| 1.8641           | 0.4731 | 1.2000                | 0.3258 | 1.8072     | 0.5431 |
| 2.1523           | 0.5583 | 1.3100                | 0.4339 | 2.3622     | 0.7214 |
| 2.4020           | 0.6434 | 1.4200                | 0.5079 | 2.9460     | 0.9056 |
| 2.9977           | 0.8232 | 1.6800                | 0.6470 | 3.4432     | 1.0926 |
| 3.5549           | 1.0124 | 1.9400                | 0.7624 | 3.9333     | 1.2621 |
| 3.9967           | 1.1922 | 2.4900                | 0.9590 | 4.3369     | 1.4462 |
| 4.7456           | 1.5612 | 3.0300                | 1.2382 | 4.6685     | 1.6185 |
| 5.3600           | 1.9113 | 3.4300                | 1.4387 | 4.9279     | 1.7966 |
| 5.7629           | 2.2709 | 3.7500                | 1.7052 |            |        |
| 6.1657           | 2.6494 | 4.0700                | 1.9704 |            |        |
| 6.4147           | 2.9995 | 4.2600                | 2.2001 |            |        |
| 6.6252           | 3.3685 | 4.4500                | 2.4160 |            |        |
| 6.8742           | 3.7281 |                       |        |            |        |
| 7.0654           | 4.0971 |                       |        |            |        |
| 7.1798           | 4.4472 |                       |        |            |        |
| 7.2942           | 4.8257 |                       |        |            |        |
| 7.4470           | 5.1947 |                       |        |            |        |
| 7.5229           | 5.5542 |                       |        |            |        |
| 7.6362           | 6.2828 |                       |        |            |        |

Note: The specific data is from the literature (Li, X.B. and Wei, Y.T.: Classic strain energy functions and constitutive tests of rubber-like materials. Rubber Chemistry & Technology 88(4), 604-627 (2015)). The stress T in the table is nominal stress. The equidistant data points with different deformation ranges from the dataset are shown in the file--Treloar.xlsx.

**Table S2** The experimental data for isoprene vulcanized rubber from Kawabata[49]

| Uniaxial tension |               | Equal-biaxial tension |               | Pure shear |               |
|------------------|---------------|-----------------------|---------------|------------|---------------|
| $\lambda$        | $\sigma$ /MPa | $\lambda$             | $\sigma$ /MPa | $\lambda$  | $\sigma$ /MPa |
| 1.00             | 0             | 1.00                  | 0             | 1.00       | 0             |
| 1.04             | 0.045         | 1.04                  | 0.088         | 1.04       | 0.061         |
| 1.06             | 0.065         | 1.06                  | 0.129         | 1.06       | 0.091         |
| 1.08             | 0.093         | 1.08                  | 0.178         | 1.08       | 0.122         |
| 1.10             | 0.117         | 1.10                  | 0.218         | 1.10       | 0.152         |
| 1.12             | 0.140         | 1.12                  | 0.257         | 1.12       | 0.181         |
| 1.14             | 0.163         | 1.14                  | 0.293         | 1.14       | 0.209         |
| 1.16             | 0.186         | 1.16                  | 0.329         | 1.16       | 0.238         |
| 1.20             | 0.235         | 1.20                  | 0.396         | 1.20       | 0.294         |
| 1.24             | 0.282         | 1.24                  | 0.461         | 1.24       | 0.349         |
| 1.30             | 0.351         | 1.30                  | 0.547         | 1.30       | 0.434         |
| 1.60             | 0.693         | 1.60                  | 0.976         | 1.60       | 0.819         |
| 1.90             | 1.051         | 1.90                  | 1.414         | 1.90       | 1.193         |
| 2.20             | 1.432         | 2.20                  | 1.896         | 2.20       | 1.593         |
| 2.50             | 1.850         | 2.50                  | 2.435         | 2.50       | 2.022         |
| 2.80             | 2.316         | 2.80                  | 3.030         | 2.80       | 2.482         |
| 3.10             | 2.849         | 3.10                  | 3.689         | 3.10       | 2.973         |
| 3.40             | 3.454         |                       |               | 3.40       | 3.505         |
| 3.70             | 4.133         |                       |               | 3.70       | 4.077         |

Note: The specific data is from the literature (Afshin Anssari-Benam, Andrea Bucchi. A generalised neo-Hookean strain energy function for application to the finite deformation of elastomers[J]. International Journal of Non-Linear Mechanics, 2021, 128:103626.). The stress  $\sigma$  in the table is true stress.

**Table S3** The experimental data for unfilled silicone rubber from Meunier[17]

| Uniaxial tension |                     | Equal-biaxial tension |                     | Pure shear |                     |
|------------------|---------------------|-----------------------|---------------------|------------|---------------------|
| $\lambda$        | $\sigma/\text{MPa}$ | $\lambda$             | $\sigma/\text{MPa}$ | $\lambda$  | $\sigma/\text{MPa}$ |
| 0.49             | -0.68               | 1                     | 0                   | 1          | 0                   |
| 0.52             | -0.62               | 1.05                  | 0.10                | 1.02       | 0.05                |
| 0.55             | -0.56               | 1.10                  | 0.20                | 1.05       | 0.10                |
| 0.58             | -0.51               | 1.18                  | 0.32                | 1.10       | 0.17                |
| 0.61             | -0.46               | 1.23                  | 0.41                | 1.15       | 0.23                |
| 0.64             | -0.41               | 1.34                  | 0.54                | 1.22       | 0.30                |
| 0.67             | -0.37               | 1.44                  | 0.69                | 1.29       | 0.39                |
| 0.71             | -0.33               | 1.54                  | 0.83                | 1.38       | 0.48                |
| 0.74             | -0.29               | 1.68                  | 1.09                | 1.48       | 0.59                |
| 0.77             | -0.26               | 1.77                  | 1.31                | 1.57       | 0.71                |
| 0.80             | -0.22               | 1.80                  | 1.39                | 1.66       | 0.83                |
| 0.83             | -0.18               | 1.84                  | 1.52                | 1.75       | 0.96                |
| 0.86             | -0.15               | 1.95                  | 1.97                | 1.83       | 1.10                |
| 0.89             | -0.11               | 2.06                  | 2.72                | 1.90       | 1.24                |
| 0.93             | -0.08               |                       |                     | 1.97       | 1.38                |
| 0.96             | -0.04               |                       |                     | 2.02       | 1.51                |
| 1.00             | 0                   |                       |                     | 2.07       | 1.66                |
| 1.05             | 0.05                |                       |                     | 2.12       | 1.80                |
| 1.11             | 0.11                |                       |                     | 2.15       | 1.94                |
| 1.18             | 0.17                |                       |                     |            |                     |
| 1.27             | 0.25                |                       |                     |            |                     |
| 1.36             | 0.33                |                       |                     |            |                     |
| 1.46             | 0.44                |                       |                     |            |                     |
| 1.56             | 0.54                |                       |                     |            |                     |
| 1.66             | 0.66                |                       |                     |            |                     |
| 1.76             | 0.78                |                       |                     |            |                     |
| 1.85             | 0.91                |                       |                     |            |                     |
| 1.93             | 1.06                |                       |                     |            |                     |
| 1.99             | 1.18                |                       |                     |            |                     |
| 2.04             | 1.32                |                       |                     |            |                     |
| 2.09             | 1.45                |                       |                     |            |                     |
| 2.14             | 1.60                |                       |                     |            |                     |
| 2.17             | 1.73                |                       |                     |            |                     |

Note: The specific data is from the literature (Afshin Anssari-Benam, Andrea Bucchi. A generalised neo-Hookean strain energy function for application to the finite deformation of elastomers[J]. International Journal of Non-Linear Mechanics, 2021, 128:103626.). The stress  $\sigma$  in the table is true stress.

**Table S4** The experimental data for poly-acrylamide hydrogel from Yohsuke[50]

| Uniaxial tension |                     | Equal-biaxial tension |                     | Pure shear |                     |
|------------------|---------------------|-----------------------|---------------------|------------|---------------------|
| $\lambda$        | $\sigma/\text{KPa}$ | $\lambda$             | $\sigma/\text{KPa}$ | $\lambda$  | $\sigma/\text{KPa}$ |
| 1.00             | 0                   | 1.00                  | 0                   | 1.00       | 0                   |
| 1.06             | 1.08                | 1.06                  | 2.06                | 1.06       | 1.67                |
| 1.13             | 2.20                | 1.13                  | 4.08                | 1.13       | 2.93                |
| 1.25             | 4.17                | 1.25                  | 7.19                | 1.25       | 5.10                |
| 1.38             | 6.28                | 1.38                  | 10.51               | 1.38       | 7.69                |
| 1.54             | 9.16                | 1.54                  | 14.60               | 1.54       | 10.73               |
| 1.72             | 12.24               | 1.72                  | 18.92               | 1.72       | 14.47               |
| 1.91             | 16.08               | 1.91                  | 24.57               | 1.91       | 18.56               |
| 2.10             | 20.04               | 2.10                  | 30.74               | 2.10       | 22.76               |
| 2.29             | 24.63               | 2.29                  | 37.37               | 2.29       | 27.39               |
| 2.47             | 29.10               | 2.47                  | 44.68               | 2.47       | 32.54               |
| 2.72             | 36.23               |                       |                     | 2.72       | 39.25               |
| 3.03             | 46.581              |                       |                     |            |                     |
| 3.32             | 57.23               |                       |                     |            |                     |
| 3.60             | 69.59               |                       |                     |            |                     |
| 4.00             | 91.85               |                       |                     |            |                     |

Note: The specific data is from the literature (Afshin Anssari-Benam. Large isotropic elastic deformations: on a comprehensive model to correlate the theory and experiments for incompressible rubber-like materials[J]. Journal of Elasticity, 2023, 153:219-244.). The stress  $\sigma$  in the table is Cauchy stress.

**Table S5** The experimental data for carbon-black-filled styrene butadiene rubber from Fujikawa[51]

| Uniaxial tension |                     | Equal-biaxial tension |                     | Pure shear |                     |
|------------------|---------------------|-----------------------|---------------------|------------|---------------------|
| $\lambda$        | $\sigma/\text{MPa}$ | $\lambda$             | $\sigma/\text{MPa}$ | $\lambda$  | $\sigma/\text{MPa}$ |
| 1                | 0                   | 1                     | 0                   | 1          | 0                   |
| 1.05             | 0.32                | 1.04                  | 0.52                | 1.04       | 0.42                |
| 1.11             | 0.59                | 1.09                  | 0.94                | 1.09       | 0.74                |
| 1.16             | 0.81                | 1.14                  | 1.26                | 1.14       | 1.00                |

|      |      |      |      |      |      |
|------|------|------|------|------|------|
| 1.21 | 0.99 | 1.18 | 1.53 | 1.19 | 1.21 |
| 1.26 | 1.18 | 1.23 | 1.75 | 1.23 | 1.41 |
| 1.31 | 1.33 | 1.28 | 2.00 | 1.28 | 1.60 |
| 1.36 | 1.48 | 1.32 | 2.25 | 1.33 | 1.78 |
| 1.41 | 1.65 | 1.37 | 2.49 | 1.38 | 2.00 |
| 1.46 | 1.85 | 1.42 | 2.79 | 1.42 | 2.17 |
| 1.51 | 2.00 | 1.46 | 3.11 | 1.47 | 2.37 |
| 1.56 | 2.22 | 1.51 | 3.43 | 1.52 | 2.59 |
| 1.60 | 2.42 | 1.56 | 3.75 | 1.57 | 2.81 |
| 1.65 | 2.62 | 1.61 | 4.05 | 1.62 | 3.04 |
| 1.72 | 2.81 | 1.66 | 4.34 | 1.66 | 3.23 |
| 1.74 | 2.99 | 1.70 | 4.54 | 1.71 | 3.41 |
| 1.79 | 3.11 |      |      | 1.76 | 3.55 |

Note: The specific data is from the literature (Afshin Anssari-Benam. Comparative modelling results between a separable and a non-separable form of principal stretches-based strain energy functions for a variety of isotropic incompressible soft solids: Ogden model compared with a parent model[J]. Mechanics of Soft Materials, 2023, 5:2.). The stress  $\sigma$  in the table is true stress.

**Table S6** The experimental data for human brain tissue from Budday[52]

| Uniaxial tension |                     | Simple shear |                     |
|------------------|---------------------|--------------|---------------------|
| $\lambda$        | $\sigma/\text{KPa}$ | $\gamma$     | $\sigma/\text{KPa}$ |
| 0.90             | -1.06               | -0.20        | -0.55               |
| 0.91             | -0.82               | -0.175       | -0.38               |
| 0.92             | -0.62               | -0.15        | -0.27               |
| 0.94             | -0.46               | -0.125       | -0.19               |
| 0.95             | -0.33               | -0.10        | -0.14               |
| 0.96             | -0.225              | -0.075       | -0.1                |
| 0.975            | -0.135              | -0.05        | -0.06               |
| 0.99             | -0.06               | -0.02        | -0.04               |
| 1.00             | 0                   | 0            | 0                   |
| 1.01             | 0.04                | 0.02         | 0.03                |
| 1.025            | 0.08                | 0.05         | 0.06                |
| 1.04             | 0.12                | 0.07         | 0.1                 |
| 1.05             | 0.15                | 0.10         | 0.14                |
| 1.06             | 0.19                | 0.12         | 0.19                |
| 1.075            | 0.25                | 0.15         | 0.27                |
| 1.09             | 0.34                | 0.17         | 0.37                |
| 1.10             | 0.46                | 0.20         | 0.54                |

Note: The specific data is from the literature (Afshin Anssari-Benam, Michel Destrade, Giuseppe Saccomandi. Modelling brain tissue elasticity with the Ogden model and an alternative family of constitutive models[J]. Philosophical Transactions A, 2022, 380:20210325). The stress  $\sigma$  in the table is true stress.

**Table S7.** The model parameters for large deformation in Table 1

| Model                  | Parameters                                                                                                                                            |
|------------------------|-------------------------------------------------------------------------------------------------------------------------------------------------------|
| Ogden-N3               | $\alpha_1=4.720$ ; $\mu_1=0.005 \text{ MPa}$ ; $\alpha_2=1.334$ ; $\mu_2=0.357 \text{ MPa}$ ; $\alpha_3=-1.812$ ; $\mu_3=0.016 \text{ MPa}$ ;         |
| Alexander              | $C_1=0.139 \text{ MPa}$ ; $C_2=0.320 \text{ MPa}$ ; $C_3=0.002 \text{ MPa}$ ; $k=0.000338$ ; $\gamma=12.10744$ ;                                      |
| Yeoh                   | $C_{10}=0.152 \text{ MPa}$ ; $C_{20}=0 \text{ MPa}$ ; $C_{30}=0.0000228 \text{ MPa}$ ;                                                                |
| Melly                  | $C_{10}=0.137 \text{ MPa}$ ; $C_{20}=0 \text{ MPa}$ ; $C_{30}=0.0000235 \text{ MPa}$ ; $D=0.094 \text{ MPa}$ ;                                        |
| Modified Yeoh          | $C_{10}=1.44\text{E}-7 \text{ MPa}$ ; $C_{20}=0.00148 \text{ MPa}$ ; $C_{30}=0.0000189 \text{ MPa}$ ; $\alpha=0.165 \text{ MPa}$ ; $\beta=0.0288$ ;   |
| Generalized Yeoh       | $K_1=1.2278 \text{ MPa}$ ; $m=1$ ; $K_2=-1.0309 \text{ MPa}$ ; $p=1.01847$ ; $K_3=0.000392 \text{ MPa}$ ; $q=2.3972$ ;                                |
| Anssari-Benam          | $\mu=0.29086 \text{ MPa}$ ; $N=24.9907$ ; $n=2.0108$ ;                                                                                                |
| Modified Anssari-Benam | $\mu=1.1692 \text{ MPa}$ ; $N=0.05779$ ; $n=3.35977$ ; $\alpha=0.003166 \text{ MPa}$ ; $\beta=2.3647$ ;                                               |
| My work                | $C_{10}=0.112895 \text{ MPa}$ ; $C_{20}=0.00041 \text{ MPa}$ ; $C_{30}=0.000021669 \text{ MPa}$ ; $\alpha=0.792239 \text{ MPa}$ ; $\beta=0.3361846$ ; |

**Table S8.** The model parameters for medium deformation in Table 1

| Model            | Parameters                                                                                                                                                   |
|------------------|--------------------------------------------------------------------------------------------------------------------------------------------------------------|
| Ogden-N3         | $\alpha_1=0.39472$ ; $\mu_1=0.268358 \text{ MPa}$ ; $\alpha_2=3.010134$ ; $\mu_2=0.081632 \text{ MPa}$ ; $\alpha_3=-1.88910$ ; $\mu_3=0.00923 \text{ MPa}$ ; |
| Alexander        | $C_1=0.132 \text{ MPa}$ ; $C_2=0.262585 \text{ MPa}$ ; $C_3=0.003018 \text{ MPa}$ ; $k=0.00045775$ ; $\gamma=6.62166$ ;                                      |
| Yeoh             | $C_{10}=0.1575635 \text{ MPa}$ ; $C_{20}=0 \text{ MPa}$ ; $C_{30}=0.000010285 \text{ MPa}$ ;                                                                 |
| Melly            | $C_{10}=0.13631957 \text{ MPa}$ ; $C_{20}=0 \text{ MPa}$ ; $C_{30}=0.0000203 \text{ MPa}$ ; $D=0.1120827 \text{ MPa}$ ;                                      |
| Modified Yeoh    | $C_{10}=0.148625 \text{ MPa}$ ; $C_{20}=0.0004428 \text{ MPa}$ ; $C_{30}=0.0000039786 \text{ MPa}$ ; $\alpha=0.032364 \text{ MPa}$ ; $\beta=0.47151486$ ;    |
| Generalized Yeoh | $K_1=0.1917369 \text{ MPa}$ ; $m=1$ ; $K_2=-0.072778 \text{ MPa}$ ; $p=1.5876$ ; $K_3=0.0554836 \text{ MPa}$ ; $q=1.65405$ ;                                 |

|                        |                                                                                                                                |
|------------------------|--------------------------------------------------------------------------------------------------------------------------------|
| Anssari-Benam          | $\mu=0.313768 \text{ MPa}; N=12.41387; n=1.04495;$                                                                             |
| Modified Anssari-Benam | $\mu=0.215047 \text{ MPa}; N=25.51408; n=85.0; \alpha=0.6880299 \text{ MPa}; \beta=0.37208;$                                   |
| My work                | $C_{10}=0.0938605 \text{ MPa}; C_{20}=0.00138968 \text{ MPa}; C_{30}=0 \text{ MPa}; \alpha=3.6362 \text{ MPa}; \beta=0.09307;$ |

**Table S9.** The model parameters for small deformation in Table 1

| Model                  | Parameters                                                                                                                                     |
|------------------------|------------------------------------------------------------------------------------------------------------------------------------------------|
| Ogden-N3               | $\alpha_1=-0.42082; \mu_1=0.094627 \text{ MPa}; \alpha_2=2.822296; \mu_2=0.096908 \text{ MPa}; \alpha_3=0.56605; \mu_3=0.1682697 \text{ MPa};$ |
| Alexander              | $C_1=0.125446 \text{ MPa}; C_2=0.180328 \text{ MPa}; C_3=0.007073 \text{ MPa}; k=0.000964878; \gamma=3.7760124;$                               |
| Yeoh                   | $C_{10}=0.16289 \text{ MPa}; C_{20}=0 \text{ MPa}; C_{30}=0 \text{ MPa};$                                                                      |
| Melly                  | $C_{10}=0.131834 \text{ MPa}; C_{20}=0 \text{ MPa}; C_{30}=0 \text{ MPa}; D=0.14487 \text{ MPa};$                                              |
| Modified Yeoh          | $C_{10}=0.009 \text{ MPa}; C_{20}=0.002555 \text{ MPa}; C_{30}=0.0000001147 \text{ MPa}; \alpha=0.16779856 \text{ MPa}; \beta=0.07253678;$     |
| Generalized Yeoh       | $K_1=0.46885 \text{ MPa}; m=1; K_2=-0.4695 \text{ MPa}; p=1.122683; K_3=0.186023 \text{ MPa}; q=1.22587;$                                      |
| Anssari-Benam          | $\mu=0.37157 \text{ MPa}; N=42.787; n=0.26312;$                                                                                                |
| Modified Anssari-Benam | $\mu=0.19653 \text{ MPa}; N=13.6234; n=3.10978; \alpha=1.236187 \text{ MPa}; \beta=0.2478425;$                                                 |
| My work                | $C_{10}=0.09095 \text{ MPa}; C_{20}=0.00133 \text{ MPa}; C_{30}=0 \text{ MPa}; \alpha=8.7237 \text{ MPa}; \beta=0.04076;$                      |

**Table S10.** The model parameters for isoprene vulcanized rubber in Table 2

| Model                  | Parameters                                                                                                                               |
|------------------------|------------------------------------------------------------------------------------------------------------------------------------------|
| Ogden-N3               | $\alpha_1=-1.5722; \mu_1=0.01719 \text{ MPa}; \alpha_2=10.5078; \mu_2=0.000001 \text{ MPa}; \alpha_3=1.6233; \mu_3=0.37751 \text{ MPa};$ |
| Alexander              | $C_1=0.1444 \text{ MPa}; C_2=0.16637 \text{ MPa}; C_3=0.00337 \text{ MPa}; k=0; \gamma=3.535169;$                                        |
| Yeoh                   | $C_{10}=0.1575 \text{ MPa}; C_{20}=0 \text{ MPa}; C_{30}=0.00000259 \text{ MPa};$                                                        |
| Melly                  | $C_{10}=0.147067 \text{ MPa}; C_{20}=0 \text{ MPa}; C_{30}=0 \text{ MPa}; D=0.095079 \text{ MPa};$                                       |
| Modified Yeoh          | $C_{10}=0.0056 \text{ MPa}; C_{20}=0.000337 \text{ MPa}; C_{30}=0.00011 \text{ MPa}; \alpha=0.1860795 \text{ MPa}; \beta=0.05467;$       |
| Generalized Yeoh       | $K_1=1.16528 \text{ MPa}; m=1; K_2=-0.97185 \text{ MPa}; p=1.01405; K_3=0.0000001 \text{ MPa}; q=5.08984;$                               |
| Anssari-Benam          | $\mu=0.22303 \text{ MPa}; N=0.601714; n=0.751607;$                                                                                       |
| Modified Anssari-Benam | $\mu=0.24728 \text{ MPa}; N=0.6888547; n=0.897568; \alpha=0.191818 \text{ MPa}; \beta=0.76695;$                                          |
| My work                | $C_{10}=2.494 \text{ MPa}; C_{20}=0.0034 \text{ MPa}; C_{30}=-0.00004348 \text{ MPa}; \alpha=4.475518 \text{ MPa}; \beta=-2.053077;$     |

**Table S11.** The model parameters for unfilled silicone rubber in Table 3

| Model                  | Parameters                                                                                                                              |
|------------------------|-----------------------------------------------------------------------------------------------------------------------------------------|
| Ogden-N3               | $\alpha_1=0.3587; \mu_1=0.28225 \text{ MPa}; \alpha_2=-6.45; \mu_2=0.000245 \text{ MPa}; \alpha_3=5.6138; \mu_3=0.036298 \text{ MPa};$  |
| Alexander              | $C_1=0.16297 \text{ MPa}; C_2=0.0261936 \text{ MPa}; C_3=0 \text{ MPa}; k=0.021613; \gamma=1.672377859;$                                |
| Yeoh                   | $C_{10}=0.10936 \text{ MPa}; C_{20}=0.047917 \text{ MPa}; C_{30}=0 \text{ MPa};$                                                        |
| Melly                  | $C_{10}=0.16308897 \text{ MPa}; C_{20}=0 \text{ MPa}; C_{30}=0.00159675 \text{ MPa}; D=0.0141 \text{ MPa};$                             |
| Modified Yeoh          | $C_{10}=0.155636 \text{ MPa}; C_{20}=0.00338289 \text{ MPa}; C_{30}=0.0013389 \text{ MPa}; \alpha=0.03732 \text{ MPa}; \beta=2.509305;$ |
| Generalized Yeoh       | $K_1=0.90577 \text{ MPa}; m=1; K_2=-0.737696 \text{ MPa}; p=1.021726; K_3=0.006919 \text{ MPa}; q=2.421487;$                            |
| Anssari-Benam          | $\mu=0.287468 \text{ MPa}; N=3.716448; n=1.62188;$                                                                                      |
| Modified Anssari-Benam | $\mu=0.272177 \text{ MPa}; N=3.658636; n=1.58244; \alpha=0.54795 \text{ MPa}; \beta=0.084;$                                             |
| My work                | $C_{10}=0.17927 \text{ MPa}; C_{20}=-0.00731 \text{ MPa}; C_{30}=0.00322 \text{ MPa}; \alpha=-0.00068986 \text{ MPa}; \beta=4.70799;$   |

**Table S12.** The model parameters for poly-arcylamide hydrogel in Table 4

| Model         | Parameters                                                                                                                                        |
|---------------|---------------------------------------------------------------------------------------------------------------------------------------------------|
| Ogden-N3      | $\alpha_1=1.99617; \mu_1=0.004565 \text{ MPa}; \alpha_2=-1.26655; \mu_2=0.0010889 \text{ MPa}; \alpha_3=7.226208; \mu_3=0.000002788 \text{ MPa};$ |
| Alexander     | $C_1=0.0023 \text{ MPa}; C_2=0.004895 \text{ MPa}; C_3=0.00008 \text{ MPa}; k=0.001156; \gamma=12.0408;$                                          |
| Yeoh          | $C_{10}=0.0027 \text{ MPa}; C_{20}=0 \text{ MPa}; C_{30}=3.874E-7 \text{ MPa};$                                                                   |
| Melly         | $C_{10}=0.0022 \text{ MPa}; C_{20}=0.000006824 \text{ MPa}; C_{30}=8.49E-7 \text{ MPa}; D=0.0022786 \text{ MPa};$                                 |
| Modified Yeoh | $C_{10}=0.00251 \text{ MPa}; C_{20}=0.0000152 \text{ MPa}; C_{30}=0 \text{ MPa}; \alpha=0.000321 \text{ MPa}; \beta=0.35653;$                     |

|                        |                                                                                                                              |
|------------------------|------------------------------------------------------------------------------------------------------------------------------|
| Generalized Yeoh       | $K_1=0.050987 \text{ MPa}; m=1.0755; K_2=-0.0491 \text{ MPa}; p=1.08738; K_3=0.001006 \text{ MPa}; q=1.338512;$              |
| Anssari-Benam          | $\mu=0.096 \text{ MPa}; N=0.00618; n=16.68516;$                                                                              |
| Modified Anssari-Benam | $\mu=0.004677 \text{ MPa}; N=7.81967; n=1.09826; \alpha=0.0012 \text{ MPa}; \beta=1.369;$                                    |
| My work                | $C_{10}=0.00187 \text{ MPa}; C_{20}=0.0000316 \text{ MPa}; C_{30}=0 \text{ MPa}; \alpha=0.00628 \text{ MPa}; \beta=0.59589;$ |

**Table S13.** The model parameters for carbon-black-filled styrene butadiene rubber in Table 5

| Model                  | Parameters                                                                                                                               |
|------------------------|------------------------------------------------------------------------------------------------------------------------------------------|
| Ogden-N3               | $\alpha_1=0.909289; \mu_1=1.25589 \text{ MPa}; \alpha_2=-4.18085; \mu_2=0.0101 \text{ MPa}; \alpha_3=0.8449; \mu_3=0.25837 \text{ MPa};$ |
| Alexander              | $C_1=0.49284 \text{ MPa}; C_2=0.07262 \text{ MPa}; C_3=0.11140 \text{ MPa}; k=1.49E-8; \gamma=0.165188;$                                 |
| Yeoh                   | $C_{10}=0.655183 \text{ MPa}; C_{20}=0 \text{ MPa}; C_{30}=0.00693 \text{ MPa};$                                                         |
| Melly                  | $C_{10}=0.5132 \text{ MPa}; C_{20}=0 \text{ MPa}; C_{30}=0 \text{ MPa}; D=0.67044 \text{ MPa};$                                          |
| Modified Yeoh          | $C_{10}=0.4509 \text{ MPa}; C_{20}=0.07017 \text{ MPa}; C_{30}=0 \text{ MPa}; \alpha=0.49347 \text{ MPa}; \beta=2.17857;$                |
| Generalized Yeoh       | $K_1=3.16754 \text{ MPa}; m=1; K_2=-2.4819 \text{ MPa}; p=1.05753; K_3=0.046104 \text{ MPa}; q=2.39379;$                                 |
| Anssari-Benam          | $\mu=1.27325 \text{ MPa}; N=2.20960; n=1.04265;$                                                                                         |
| Modified Anssari-Benam | $\mu=1.52426 \text{ MPa}; N=7.80347; n=0.38067; \alpha=0.379 \text{ MPa}; \beta=1.8624;$                                                 |
| My work                | $C_{10}=0.164 \text{ MPa}; C_{20}=-0.0333 \text{ MPa}; C_{30}=0.0089348 \text{ MPa}; \alpha=-4.16605 \text{ MPa}; \beta=-0.6066;$        |

**Table S14.** The model parameters for human brain cortex tissue in Table 6

| Model                     | Parameters                                                                                                                                 |
|---------------------------|--------------------------------------------------------------------------------------------------------------------------------------------|
| Ogden-N3                  | $\alpha_1=61.2136; \mu_1=0.01101 \text{ KPa}; \alpha_2=-21.351585; \mu_2=1.2009 \text{ KPa}; \alpha_3=2.49218; \mu_3=0.00122 \text{ KPa};$ |
| Generalized Anssari-Benam | $\mu=0.02 \text{ KPa}; N=7.52; n=19.99; \alpha=-15.93;$                                                                                    |
| Modified Anssari-Benam    | $\mu=0.01145 \text{ KPa}; N=1.01874; n=1.46566; \alpha=0.09726 \text{ KPa}; \beta=21.49197;$                                               |
| My work                   | $C_{10}=10.3115 \text{ KPa}; C_{20}=6.07355 \text{ KPa}; C_{30}=87.4228 \text{ KPa}; \alpha=9.83259 \text{ KPa}; \beta=-3.93031;$          |

**Table S15.** The predictive results of different models calibrated by the data from UT of natural vulcanized rubber [24].

| Model            | Large deformation |              |              |              | Medium deformation |              |              |              | Small deformation |              |              |              |
|------------------|-------------------|--------------|--------------|--------------|--------------------|--------------|--------------|--------------|-------------------|--------------|--------------|--------------|
|                  | Error             | UT           | ET           | PS           | Error              | UT           | ET           | PS           | Error             | UT           | ET           | PS           |
| Ogden-N3         | --                | 0.982        | --           | --           | 0.032              | 0.993        | 0.928        | 0.985        | --                | 0.993        | --           | --           |
| Alexander        |                   |              |              |              |                    |              |              |              |                   |              |              |              |
| Yeoh             | 0.131             | 0.953        | 0.775        | 0.880        | 0.119              | 0.982        | 0.751        | 0.909        | 0.145             | 0.965        | 0.721        | 0.878        |
| Melly            | 0.241             | 0.959        | 0.421        | 0.895        | 0.188              | 0.993        | 0.542        | 0.900        | 0.082             | 0.990        | 0.820        | 0.946        |
| Biderman         | --                | 0.960        | --           | 0.553        | --                 | 0.993        | --           | 0.663        | --                | 0.990        | --           | 0.831        |
| Polynomial-N2    | --                | 0.916        | --           | --           | --                 | 0.993        | --           | 0.568        | --                | 0.992        | --           | 0.208        |
| GeneralizedYeoh  | 0.095             | 0.972        | 0.783        | 0.960        | 0.117              | 0.991        | 0.751        | 0.909        | 0.124             | 0.994        | 0.727        | 0.908        |
| Arruda-Boyce     | 0.126             | 0.966        | 0.773        | 0.884        | 0.124              | 0.977        | 0.751        | 0.899        | 0.145             | 0.965        | 0.721        | 0.878        |
| Exp-Ln           | 0.127             | 0.957        | 0.773        | 0.889        | 0.114              | 0.989        | 0.751        | 0.916        | 0.125             | 0.986        | 0.727        | 0.913        |
| Modified-Yeoh    | 0.112             | 0.965        | 0.779        | 0.920        | 0.115              | 0.993        | 0.752        | 0.912        | 0.128             | 0.990        | 0.726        | 0.901        |
| <b>This work</b> | <b>0.041</b>      | <b>0.960</b> | <b>0.966</b> | <b>0.952</b> | <b>0.022</b>       | <b>0.989</b> | <b>0.959</b> | <b>0.987</b> | <b>0.026</b>      | <b>0.988</b> | <b>0.949</b> | <b>0.987</b> |

Notes: Error indicates the total error in predicting the three modes of deformation; UT, ET and PS represent the goodness of fit of different models for uniaxial tension, equi-biaxial tension and pure shear; "--" indicates that the goodness of fit is negative and the prediction is invalid.

**Table S16.** The model parameters for large deformation in Table 7

| Model            | Parameters                                                                                                                                 |
|------------------|--------------------------------------------------------------------------------------------------------------------------------------------|
| Ogden-N3         | $\alpha_1=2.38743; \mu_1=0.17449 \text{ MPa}; \alpha_2=-0.69033; \mu_2=0.16442 \text{ MPa}; \alpha_3=7.931477; \mu_3=0.00001 \text{ MPa};$ |
| Alexander        | $C_1=0.14023 \text{ MPa}; C_2=0.023797 \text{ MPa}; C_3=0.0118826 \text{ MPa}; k=0.0003355; \gamma=0.651445;$                              |
| Yeoh             | $C_{10}=0.14971 \text{ MPa}; C_{20}=0 \text{ MPa}; C_{30}=0.0000225 \text{ MPa};$                                                          |
| Melly            | $C_{10}=0.12486 \text{ MPa}; C_{20}=3.979E-8 \text{ MPa}; C_{30}=0.000026179 \text{ MPa}; D=0.17694 \text{ MPa};$                          |
| Modified Yeoh    | $C_{10}=2.099E-7 \text{ MPa}; C_{20}=0.0001419 \text{ MPa}; C_{30}=0.00002889 \text{ MPa}; \alpha=0.1643997 \text{ MPa}; \beta=0.01107;$   |
| Generalized Yeoh | $K_1=0.1606 \text{ MPa}; m=1; K_2=-1.78E-7 \text{ MPa}; p=1.00064; K_3=0.0000001 \text{ MPa}; q=4.28993;$                                  |
| Anssari-Benam    | $\mu=0.288323 \text{ MPa}; N=24.36469; n=1.848835;$                                                                                        |

|                        |                                                                                                                                                      |
|------------------------|------------------------------------------------------------------------------------------------------------------------------------------------------|
| Modified Anssari-Benam | $\mu=6.033266 \text{ MPa}$ ; $N=0.02078$ ; $n=16.496647$ ; $\alpha=0.00002889 \text{ MPa}$ ; $\beta=0.0000419$ ;                                     |
| My work                | $C_{10}=0.121556 \text{ MPa}$ ; $C_{20}=0.0001045 \text{ MPa}$ ; $C_{30}=0.0000244 \text{ MPa}$ ; $\alpha=0.2246026 \text{ MPa}$ ; $\beta=0.91653$ ; |

**Table S17.** The model parameters for medium deformation in Table 7

| Model                  | Parameters                                                                                                                                                         |
|------------------------|--------------------------------------------------------------------------------------------------------------------------------------------------------------------|
| Ogden-N3               | $\alpha_1=3.1880758$ ; $\mu_1=0.05834 \text{ MPa}$ ; $\alpha_2=1.495376$ ; $\mu_2=0.10143955 \text{ MPa}$ ; $\alpha_3=-0.3198387$ ; $\mu_3=0.198828 \text{ MPa}$ ; |
| Alexander              | $C_1=0.13477 \text{ MPa}$ ; $C_2=0.04137 \text{ MPa}$ ; $C_3=0.01422 \text{ MPa}$ ; $k=0.000425$ ; $\gamma=1.17507$ ;                                              |
| Yeoh                   | $C_{10}=0.154369 \text{ MPa}$ ; $C_{20}=0 \text{ MPa}$ ; $C_{30}=0.00001068 \text{ MPa}$ ;                                                                         |
| Melly                  | $C_{10}=0.126125 \text{ MPa}$ ; $C_{20}=0.0003406 \text{ MPa}$ ; $C_{30}=0.00001655 \text{ MPa}$ ; $D=0.1538359 \text{ MPa}$ ;                                     |
| Modified Yeoh          | $C_{10}=0.15151 \text{ MPa}$ ; $C_{20}=0.000195 \text{ MPa}$ ; $C_{30}=0.00000748 \text{ MPa}$ ; $\alpha=0.0291045 \text{ MPa}$ ; $\beta=0.5246785$ ;              |
| Generalized Yeoh       | $K_1=0.849356 \text{ MPa}$ ; $m=1$ ; $K_2=-0.6802765 \text{ MPa}$ ; $p=1.00653$ ; $K_3=0.0000001 \text{ MPa}$ ; $q=4.434723$ ;                                     |
| Anssari-Benam          | $\mu=0.3092459 \text{ MPa}$ ; $N=11.41556785$ ; $n=1.0312297$ ;                                                                                                    |
| Modified Anssari-Benam | $\mu=0.217254657 \text{ MPa}$ ; $N=25.766939$ ; $n=85$ ; $\alpha=0.379018689 \text{ MPa}$ ; $\beta=0.6344856$ ;                                                    |
| My work                | $C_{10}=0.09435 \text{ MPa}$ ; $C_{20}=0.00141 \text{ MPa}$ ; $C_{30}=0 \text{ MPa}$ ; $\alpha=0.9361 \text{ MPa}$ ; $\beta=0.35528$ ;                             |

**Table S18.** The model parameters for small deformation in Table 7

| Model                  | Parameters                                                                                                                                                   |
|------------------------|--------------------------------------------------------------------------------------------------------------------------------------------------------------|
| Ogden-N3               | $\alpha_1=0.222160$ ; $\mu_1=0.058955 \text{ MPa}$ ; $\alpha_2=2.632$ ; $\mu_2=0.1235447 \text{ MPa}$ ; $\alpha_3=0.0444$ ; $\mu_3=0.176199 \text{ MPa}$ ;   |
| Alexander              | $C_1=0.129286 \text{ MPa}$ ; $C_2=0.20462658 \text{ MPa}$ ; $C_3=0.00149566 \text{ MPa}$ ; $k=0.0005238$ ; $\gamma=4.23884$ ;                                |
| Yeoh                   | $C_{10}=0.15199 \text{ MPa}$ ; $C_{20}=0 \text{ MPa}$ ; $C_{30}=2.755E-10 \text{ MPa}$ ;                                                                     |
| Melly                  | $C_{10}=0.128929 \text{ MPa}$ ; $C_{20}=0 \text{ MPa}$ ; $C_{30}=0.00001755 \text{ MPa}$ ; $D=0.1580353 \text{ MPa}$ ;                                       |
| Modified Yeoh          | $C_{10}=0.00063265 \text{ MPa}$ ; $C_{20}=0.001563569 \text{ MPa}$ ; $C_{30}=0.000005727 \text{ MPa}$ ; $\alpha=0.17600515 \text{ MPa}$ ; $\beta=0.057149$ ; |
| Generalized Yeoh       | $K_1=1.07821848 \text{ MPa}$ ; $m=1$ ; $K_2=-0.9109487 \text{ MPa}$ ; $p=1.011924$ ; $K_3=0.0079585 \text{ MPa}$ ; $q=1.012909$ ;                            |
| Anssari-Benam          | $\mu=0.3785835 \text{ MPa}$ ; $N=63.874$ ; $n=0.168621$ ;                                                                                                    |
| Modified Anssari-Benam | $\mu=0.19769 \text{ MPa}$ ; $N=12.6129$ ; $n=1.82063$ ; $\alpha=2.03253 \text{ MPa}$ ; $\beta=0.150266$ ;                                                    |
| My work                | $C_{10}=0.0971 \text{ MPa}$ ; $C_{20}=0.00114 \text{ MPa}$ ; $C_{30}=0 \text{ MPa}$ ; $\alpha=1.90129 \text{ MPa}$ ; $\beta=0.1717$ ;                        |

**Table S19.** The predictive results of different models calibrated by the data from UT and PS of isoprene vulcanized rubber [49].

| Models                 | The number of coefficient | Error        | UT           | ET           | PS           |
|------------------------|---------------------------|--------------|--------------|--------------|--------------|
| Ogden-N3               | 6                         | 0.061        | 0.985        | 0.847        | 0.986        |
| Alexander              | 5                         | 0.068        | 0.990        | 0.829        | 0.977        |
| Yeoh                   | 3                         | 0.095        | 0.971        | 0.798        | 0.947        |
| Melly                  | 4                         | 0.045        | 0.977        | 0.935        | 0.954        |
| ModifiedYeoh           | 5                         | 0.078        | 0.981        | 0.800        | 0.984        |
| GeneralizedYeoh        | 6                         | 0.081        | 0.986        | 0.791        | 0.980        |
| Anssari-Benam          | 3                         | 0.082        | 0.985        | 0.787        | 0.983        |
| Modified Anssari-Benam | 5                         | 0.047        | 0.982        | 0.903        | 0.973        |
| <b>This work</b>       | <b>5</b>                  | <b>0.041</b> | <b>0.974</b> | <b>0.911</b> | <b>0.993</b> |

Notes: Error indicates the total error of different models; UT, ET and PS represent the goodness of fit of different models for uniaxial tension, equi-biaxial tension and pure shear. “--” indicates that the goodness of fit is negative and the prediction is invalid. The model parameters are shown in Table S23 in supporting information.

**Table S20.** The predictive results of different models calibrated by the data from UT and PS of unfilled silicone rubber [17].

| Models       | The number of coefficient | Error | UT    | ET    | PS    |
|--------------|---------------------------|-------|-------|-------|-------|
| Ogden-N3     | 6                         | 0.197 | 0.979 | 0.460 | 0.971 |
| Alexander    | 5                         | 0.323 | 0.986 | 0.072 | 0.974 |
| Yeoh         | 3                         | 0.523 | 0.708 | --    | 0.820 |
| Melly        | 4                         | 0.128 | 0.980 | 0.665 | 0.973 |
| ModifiedYeoh | 5                         | 0.117 | 0.933 | 0.734 | 0.981 |

|                        |          |              |              |              |              |
|------------------------|----------|--------------|--------------|--------------|--------------|
| GeneralizedYeoh        | 6        | 0.089        | 0.931        | 0.821        | 0.982        |
| Anssari-Benam          | 3        | 0.566        | 0.937        | --           | 0.973        |
| Modified Anssari-Benam | 5        | 0.666        | 0.979        | --           | 0.973        |
| <b>This work</b>       | <b>5</b> | <b>0.134</b> | <b>0.982</b> | <b>0.642</b> | <b>0.974</b> |

Notes: Error indicates the total error of different models; UT, ET and PS represent the goodness of fit of different models for uniaxial tension, equi-biaxial tension and pure shear. "--" indicates that the goodness of fit is negative and the prediction is invalid. The model parameters are shown in Table S24 in supporting information.

**Table S21.** The predictive results of different models calibrated by the data from UT and PS of poly-arcylamide hydrogel [50].

| Models                 | The number of coefficient | Error        | UT           | ET           | PS           |
|------------------------|---------------------------|--------------|--------------|--------------|--------------|
| Ogden-N3               | 6                         | 0.051        | 0.992        | 0.864        | 0.990        |
| Alexander              | 5                         | 0.057        | 0.988        | 0.849        | 0.991        |
| Yeoh                   | 3                         | 0.091        | 0.971        | 0.771        | 0.985        |
| Melly                  | 4                         | 0.043        | 0.989        | 0.891        | 0.990        |
| ModifiedYeoh           | 5                         | 0.090        | 0.973        | 0.768        | 0.990        |
| GeneralizedYeoh        | 6                         | 0.091        | 0.974        | 0.764        | 0.990        |
| Anssari-Benam          | 3                         | 0.097        | 0.954        | 0.770        | 0.986        |
| Modified Anssari-Benam | 5                         | 0.043        | 0.990        | 0.890        | 0.991        |
| <b>This work</b>       | <b>5</b>                  | <b>0.035</b> | <b>0.992</b> | <b>0.914</b> | <b>0.990</b> |

Notes: Error indicates the total error of different models; UT, ET and PS represent the goodness of fit of different models for uniaxial tension, equi-biaxial tension and pure shear. "--" indicates that the goodness of fit is negative and the prediction is invalid. The model parameters are shown in Table S25 in supporting information.

**Table S22.** The predictive results of different models calibrated by the data from UT and PS of carbon-black-filled styrene butadiene rubber [51].

| Models                 | The number of coefficient | Error        | UT           | ET           | PS           |
|------------------------|---------------------------|--------------|--------------|--------------|--------------|
| Ogden-N3               | 6                         | 0.041        | 0.968        | 0.952        | 0.957        |
| Alexander              | 5                         | 0.037        | 0.981        | 0.927        | 0.982        |
| Yeoh                   | 3                         | 0.126        | 0.925        | 0.790        | 0.907        |
| Melly                  | 4                         | 0.066        | 0.963        | 0.901        | 0.937        |
| ModifiedYeoh           | 5                         | 0.113        | 0.967        | 0.767        | 0.927        |
| GeneralizedYeoh        | 6                         | 0.109        | 0.968        | 0.776        | 0.927        |
| Anssari-Benam          | 3                         | 0.157        | 0.942        | 0.660        | 0.925        |
| Modified Anssari-Benam | 5                         | 0.046        | 0.966        | 0.940        | 0.957        |
| <b>This work</b>       | <b>5</b>                  | <b>0.049</b> | <b>0.968</b> | <b>0.938</b> | <b>0.949</b> |

Notes: Error indicates the total error of different models; UT, ET and PS represent the goodness of fit of different models for uniaxial tension, equi-biaxial tension and pure shear. "--" indicates that the goodness of fit is negative and the prediction is invalid. The model parameters are shown in Table S26 in supporting information.

**Table S23.** The parameters of different model calibrated by the data from UT and PS of isoprene vulcanized rubber

| Model                  | Parameters                                                                                                                      |
|------------------------|---------------------------------------------------------------------------------------------------------------------------------|
| Ogden-N3               | $\alpha_1=9.72856$ ; $\mu_1=0.0000012$ MPa; $\alpha_2=4.88164$ ; $\mu_2=0.00112$ MPa; $\alpha_3=1.58782$ ; $\mu_3=0.38452$ MPa; |
| Alexander              | $C_1=0.14810$ MPa; $C_2=0.08285$ MPa; $C_3=0$ MPa; $k=0$ ; $\gamma=1.2627859$ ;                                                 |
| Yeoh                   | $C_{10}=0.155407$ MPa; $C_{20}=1E-8$ MPa; $C_{30}=0$ MPa;                                                                       |
| Melly                  | $C_{10}=0.1491316$ MPa; $C_{20}=0$ MPa; $C_{30}=0$ MPa; $D=0.06775$ MPa;                                                        |
| Modified Yeoh          | $C_{10}=0.12979$ MPa; $C_{20}=0.000289$ MPa; $C_{30}=0.00001556$ MPa; $\alpha=0.059919$ MPa; $\beta=0.161331$ ;                 |
| Generalized Yeoh       | $K_1=0.2295233$ MPa; $m=1$ ; $K_2=-0.065447$ MPa; $p=1.397285937$ ; $K_3=0.026765$ MPa; $q=1.5599$ ;                            |
| Anssari-Benam          | $\mu=0.081174$ MPa; $N=0.357115$ ; $n=0.28277$ ;                                                                                |
| Modified Anssari-Benam | $\mu=0.719328$ MPa; $N=0.0000026$ ; $n=2.6356154$ ; $\alpha=6.55401847$ MPa; $\beta=0.0289229$ ;                                |
| My work                | $C_{10}=1.376388$ MPa; $C_{20}=0.00104$ MPa; $C_{30}=-0.0000041$ MPa; $\alpha=2.29319$ MPa; $\beta=-2.064195$ ;                 |

**Table S24.** The parameters of different model calibrated by the data from UT and PS of unfilled silicone rubber

| Model         | Parameters                                                                                                                        |
|---------------|-----------------------------------------------------------------------------------------------------------------------------------|
| Ogden-N3      | $\alpha_1=1.11700$ ; $\mu_1=0.308509$ MPa; $\alpha_2=8.022885$ ; $\mu_2=0.00587$ MPa; $\alpha_3=-4.23368$ ; $\mu_3=0.013435$ MPa; |
| Alexander     | $C_1=0.126247$ MPa; $C_2=0.09678$ MPa; $C_3=0.00278596$ MPa; $k=0.05734279$ ; $\gamma=2.2575024$ ;                                |
| Yeoh          | $C_{10}=0.1206157$ MPa; $C_{20}=0$ MPa; $C_{30}=0.0158067$ MPa;                                                                   |
| Melly         | $C_{10}=0.127741686$ MPa; $C_{20}=0$ MPa; $C_{30}=0.002757$ MPa; $D=0.12116189$ MPa;                                              |
| Modified Yeoh | $C_{10}=0.1298157$ MPa; $C_{20}=0.000001266$ MPa; $C_{30}=0.00327815$ MPa; $\alpha=0.057514488$ MPa; $\beta=0.681829$ ;           |

|                        |                                                                                                                                  |
|------------------------|----------------------------------------------------------------------------------------------------------------------------------|
| Generalized Yeoh       | $K_1=0.20068558 \text{ MPa}; m=1; K_2=-0.1 \text{ MPa}; p=1.973845; K_3=0.075507 \text{ MPa}; q=2.17729;$                        |
| Anssari-Benam          | $\mu=0.318809 \text{ MPa}; N=2.1757257; n=1.0477485;$                                                                            |
| Modified Anssari-Benam | $\mu=0.1794 \text{ MPa}; N=2.4882355; n=1.4125138; \alpha=0.822476 \text{ MPa}; \beta=0.270858;$                                 |
| My work                | $C_{10}=0.101608 \text{ MPa}; C_{20}=0 \text{ MPa}; C_{30}=0.0030489 \text{ MPa}; \alpha=1.484448 \text{ MPa}; \beta=0.1724878;$ |

**Table S25.** The parameters of different model calibrated by the data from UT and PS of poly-acrylamide hydrogel

| Model                  | Parameters                                                                                                                                   |
|------------------------|----------------------------------------------------------------------------------------------------------------------------------------------|
| Ogden-N3               | $\alpha_1=1.80246; \mu_1=0.00231 \text{ MPa}; \alpha_2=0.025249; \mu_2=0.0026228 \text{ MPa}; \alpha_3=3.34351; \mu_3=0.000819 \text{ MPa};$ |
| Alexander              | $C_1=0.002433 \text{ MPa}; C_2=0.0027534 \text{ MPa}; C_3=0.0000001639 \text{ MPa}; k=0.0009197; \gamma=7.36328;$                            |
| Yeoh                   | $C_{10}=0.00268 \text{ MPa}; C_{20}=0 \text{ MPa}; C_{30}=3.725\text{E-}7 \text{ MPa};$                                                      |
| Melly                  | $C_{10}=0.00244 \text{ MPa}; C_{20}=1.34\text{E-}7 \text{ MPa}; C_{30}=7.7486\text{E-}7 \text{ MPa}; D=0.00122 \text{ MPa};$                 |
| Modified Yeoh          | $C_{10}=0.00221165 \text{ MPa}; C_{20}=0.000023585 \text{ MPa}; C_{30}=0 \text{ MPa}; \alpha=0.000607 \text{ MPa}; \beta=0.1799296;$         |
| Generalized Yeoh       | $K_1=0.92755 \text{ MPa}; m=1; K_2=-0.924766 \text{ MPa}; p=1.07449; K_3=0.0000001 \text{ MPa}; q=3.6293;$                                   |
| Anssari-Benam          | $\mu=0.066565 \text{ MPa}; N=0.0036; n=11.987967;$                                                                                           |
| Modified Anssari-Benam | $\mu=0.0039 \text{ MPa}; N=18.9523; n=32.1626; \alpha=0.024685 \text{ MPa}; \beta=0.12702178;$                                               |
| My work                | $C_{10}=0.0018258 \text{ MPa}; C_{20}=0.0000306 \text{ MPa}; C_{30}=0 \text{ MPa}; \alpha=1.7097385 \text{ MPa}; \beta=0.002398;$            |

**Table S26.** The parameters of different model calibrated by the data from UT and PS of carbon-black-filled styrene butadiene rubber

| Model                  | Parameters                                                                                                                                    |
|------------------------|-----------------------------------------------------------------------------------------------------------------------------------------------|
| Ogden-N3               | $\alpha_1=0.75172; \mu_1=0.8629886 \text{ MPa}; \alpha_2=0.7517155; \mu_2=0.59426 \text{ MPa}; \alpha_3=0.751706; \mu_3=0.09592 \text{ MPa};$ |
| Alexander              | $C_1=0.488956 \text{ MPa}; C_2=0.04274595 \text{ MPa}; C_3=0.1425747 \text{ MPa}; k=5.2357\text{E-}8; \gamma=0.0801276;$                      |
| Yeoh                   | $C_{10}=0.64822856 \text{ MPa}; C_{20}=0 \text{ MPa}; C_{30}=0 \text{ MPa};$                                                                  |
| Melly                  | $C_{10}=0.465135 \text{ MPa}; C_{20}=0 \text{ MPa}; C_{30}=0 \text{ MPa}; D=0.9250067 \text{ MPa};$                                           |
| Modified Yeoh          | $C_{10}=0.62163597 \text{ MPa}; C_{20}=2.23\text{E-}8 \text{ MPa}; C_{30}=0 \text{ MPa}; \alpha=0.344689 \text{ MPa}; \beta=4.89252;$         |
| Generalized Yeoh       | $K_1=1.78476899 \text{ MPa}; m=1; K_2=-1.32311778 \text{ MPa}; p=1.15276; K_3=0.23359 \text{ MPa}; q=1.555475;$                               |
| Anssari-Benam          | $\mu=2.0111 \text{ MPa}; N=51.836617; n=0.067696;$                                                                                            |
| Modified Anssari-Benam | $\mu=0.87155 \text{ MPa}; N=13.5647; n=0.274455; \alpha=16.056696 \text{ MPa}; \beta=0.10759;$                                                |
| My work                | $C_{10}=0.26596 \text{ MPa}; C_{20}=3.159\text{E-}6 \text{ MPa}; C_{30}=0 \text{ MPa}; \alpha=16.17489 \text{ MPa}; \beta=0.12210187;$        |

**Table S27** The parameters of the constitutive model corresponding to the Table 9.

| Methods   | Arruda-Boyce model                                     | Ogden-3N model                                                                                                                                                                    | Yeoh model                                                                                  |
|-----------|--------------------------------------------------------|-----------------------------------------------------------------------------------------------------------------------------------------------------------------------------------|---------------------------------------------------------------------------------------------|
| ABAQUS    | $\mu=0.3053 \text{ MPa}, \lambda_m=5.1322 \text{ MPa}$ | $\alpha_1=1.3913 \text{ MPa}; \mu_1=0.3430 \text{ MPa};$<br>$\alpha_2=4.7869 \text{ MPa}; \mu_2=0.0044 \text{ MPa};$<br>$\alpha_3=-1.6503 \text{ MPa}; \mu_3=0.0240 \text{ MPa};$ | $C_{10}=0.1712 \text{ MPa}$<br>$C_{20}=-0.0008 \text{ MPa}$<br>$C_{30}=0.00003 \text{ MPa}$ |
| This work | $\mu=0.2797 \text{ MPa}, \lambda_m=4.7589 \text{ MPa}$ | $\alpha_1=4.7203 \text{ MPa}; \mu_1=0.0053 \text{ MPa};$<br>$\alpha_2=1.3336 \text{ MPa}; \mu_2=0.3572 \text{ MPa};$<br>$\alpha_3=-1.8124 \text{ MPa}; \mu_3=0.0163 \text{ MPa};$ | $C_{10}=0.1631 \text{ MPa}$<br>$C_{20}=-0.0006 \text{ MPa}$<br>$C_{30}=0.00003 \text{ MPa}$ |



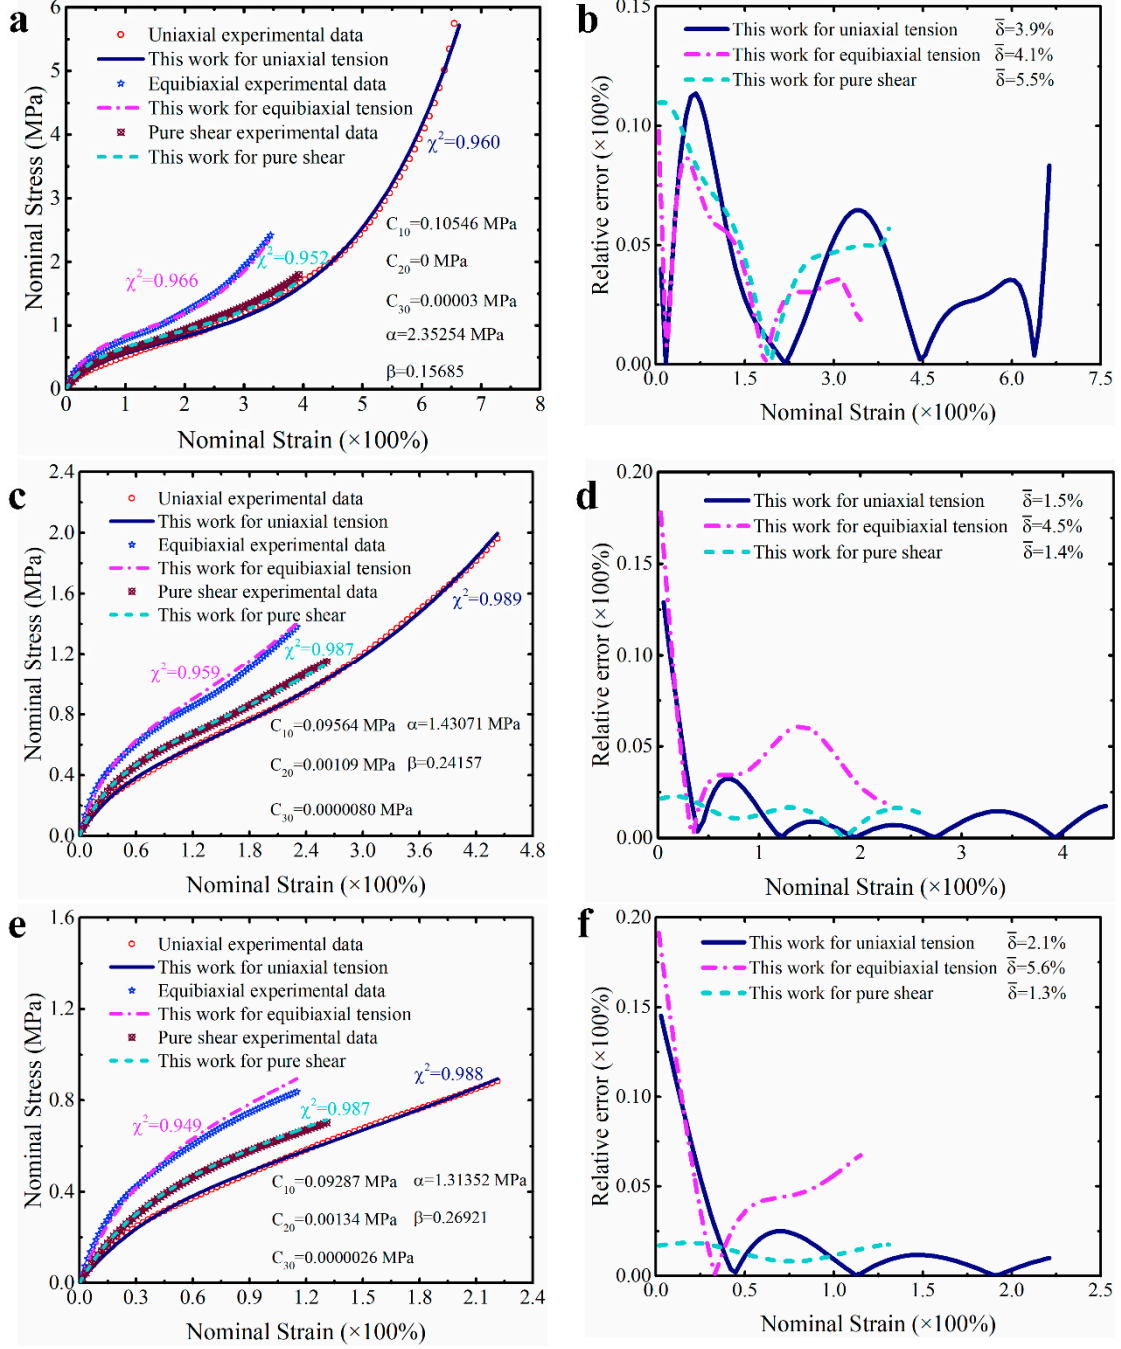

**Figure S1.** The prediction effects of the modified model for different deformation modes with different deformation ranges. (a-b) in large deformation, (c-d) in medium deformation, (e-f) in small deformation. Here, the parameters of the modified model are calibrated only by the Treloar's uniaxial experimental data with different deformation ranges.

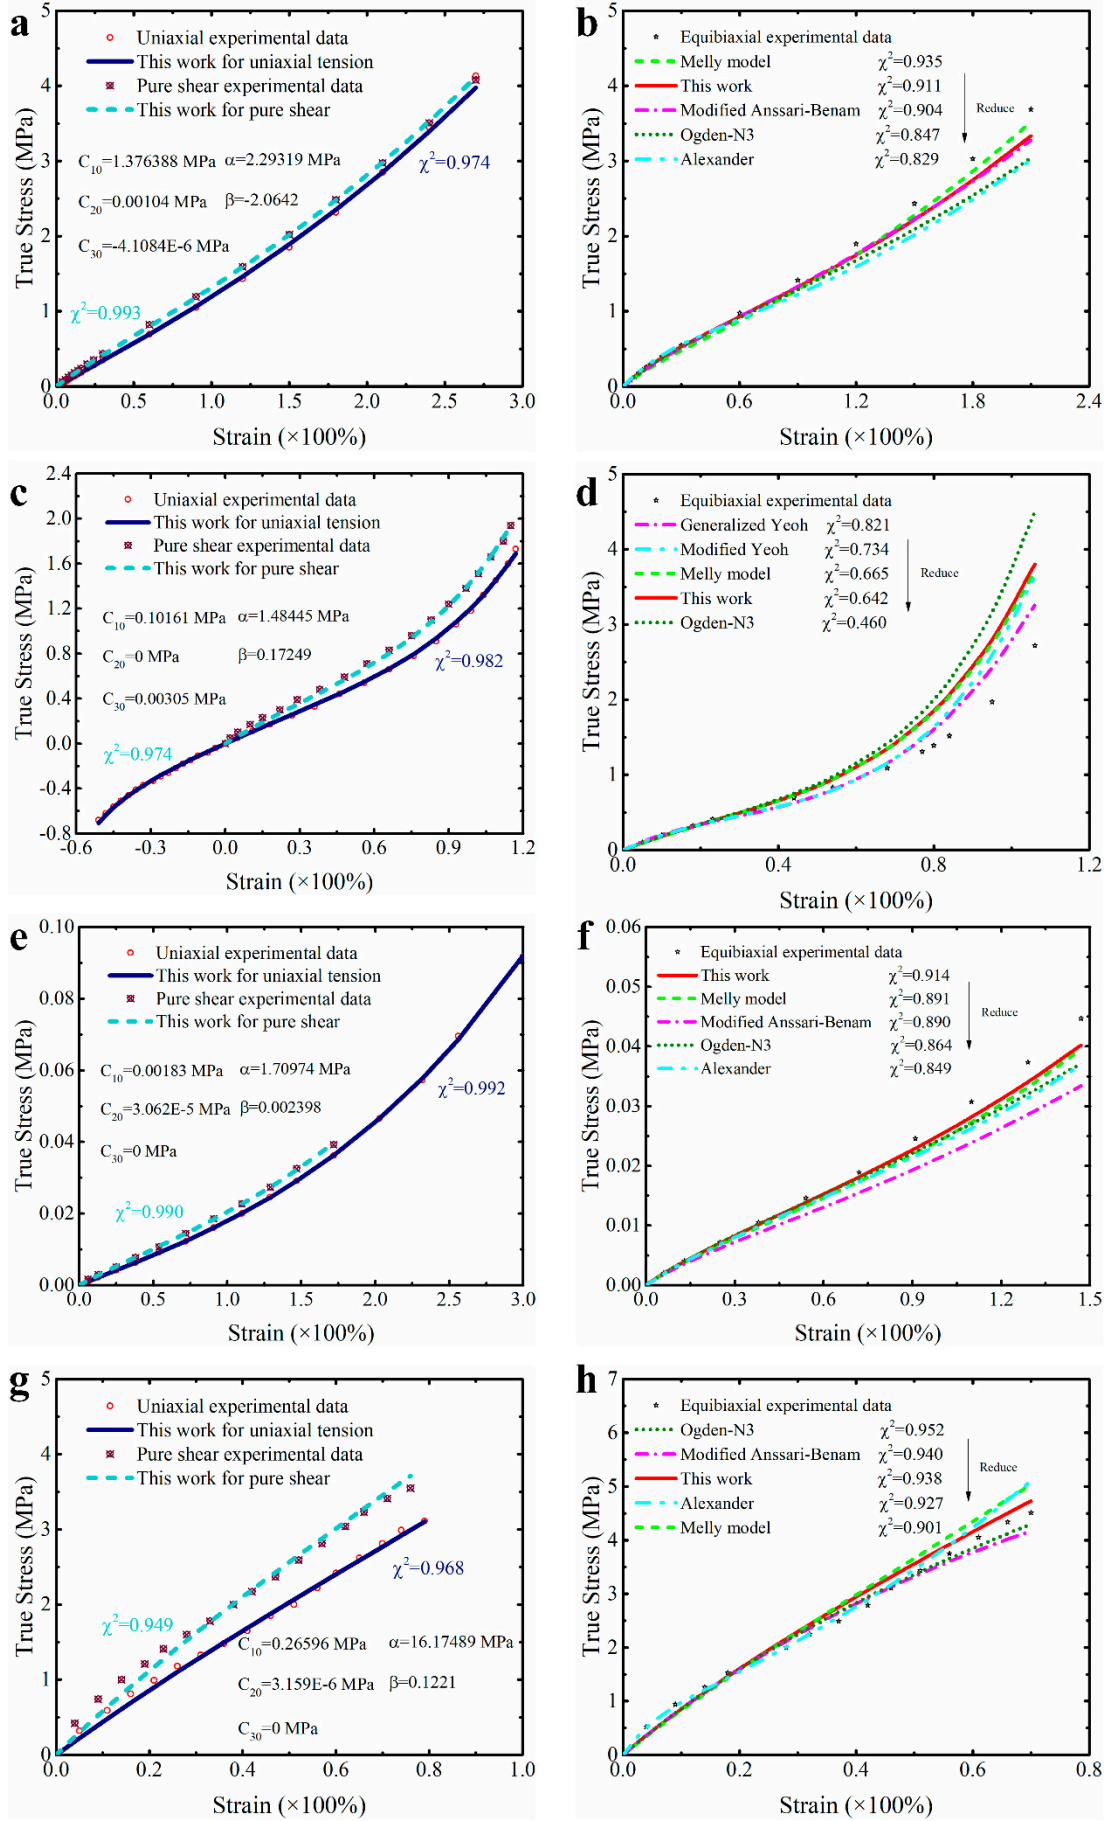

**Figure S2.** The prediction effects of the modified model for different deformation modes of different materials in the case where the parameters of model are calibrated by the data only from UT and PS. (a-b) Isoprene vulcanized rubber. (c-d) Unfilled silicone rubber. (e-f)

Poly-acrylamide hydrogel. (g-h) Carbon-black-filled styrene butadiene rubber. Only the top five constitutive models are listed on the right side of the figure.

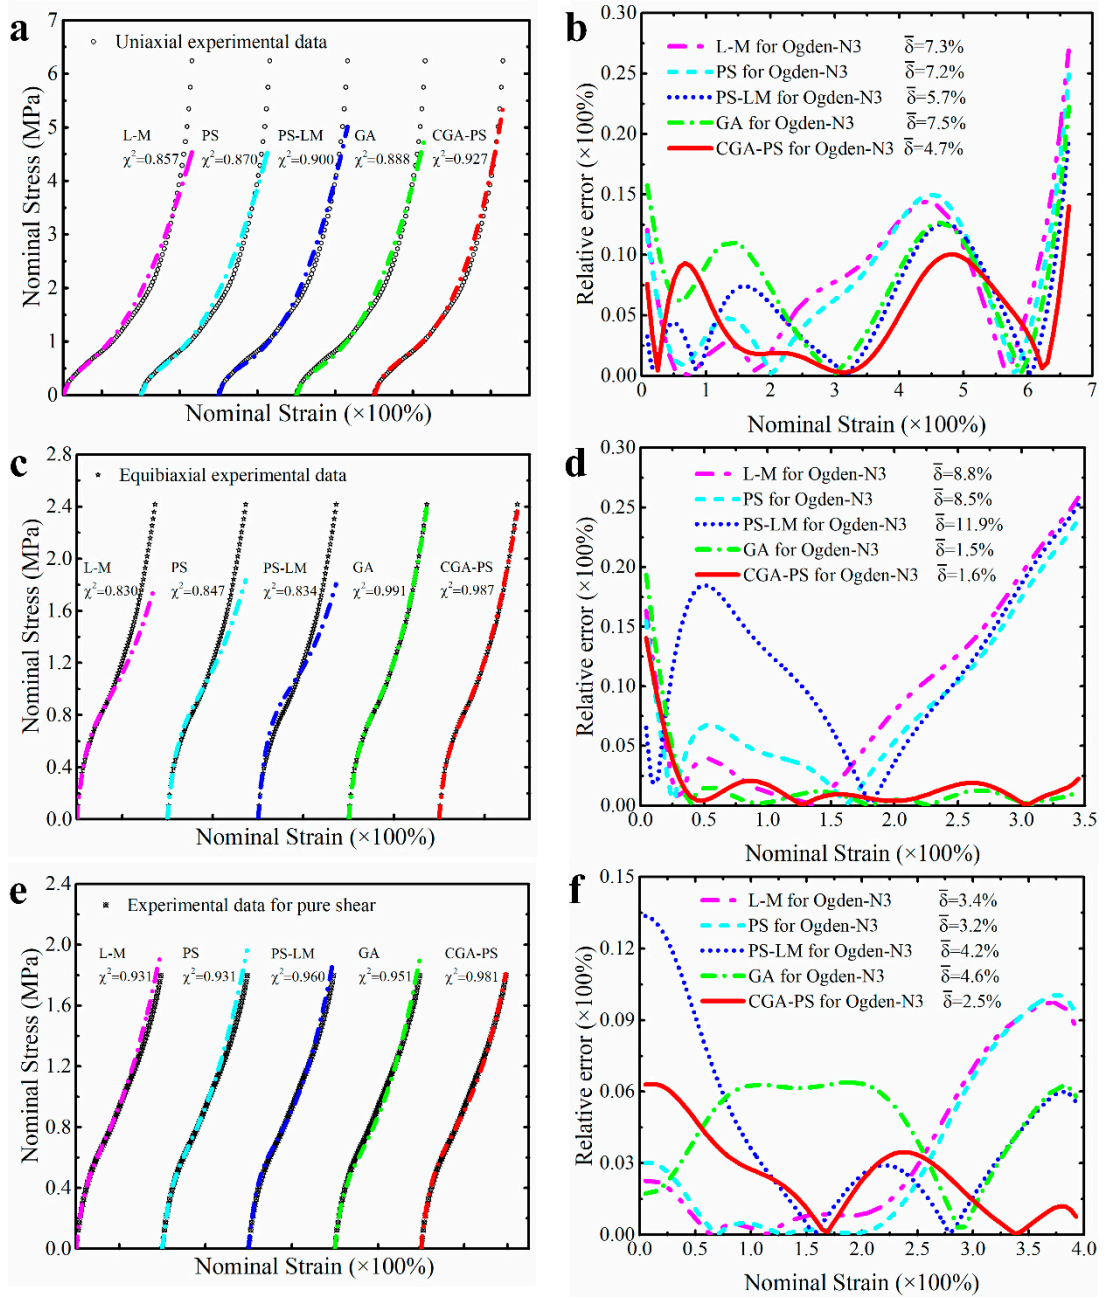

**Figure S3.** The comparison of prediction performance by the third-order Ogden model based on different methods of parameter identification. (a-b) the prediction performance of uniaxial tension by the modified model based on different methods of parameter identification. (c-d) the prediction performance of equi-biaxial tension by the modified model based on different methods of parameter identification. (e-f) the prediction performance of pure shear by the modified model based on different methods of parameter identification.  $\bar{\delta}$  means the average relative error.

**Equation S1.** Components of the Hessian matrix  $\mathbf{H}$

$$\begin{aligned}
H_{11} &= C_{10} \cdot (2 + 6\lambda_1^{-4} \lambda_2^{-2}) + 2C_{20} \cdot (2\lambda_1 - 2\lambda_1^{-3} \cdot \lambda_2^{-2}) \cdot (2\lambda_1 - 2\lambda_1^{-3} \cdot \lambda_2^{-2}) \\
&\quad + 2C_{20} \cdot (\lambda_1^2 + \lambda_2^2 + \lambda_1^{-2} \cdot \lambda_2^{-2} - 3) \cdot (2 + 6\lambda_1^{-4} \cdot \lambda_2^{-2}) \\
&\quad + 6C_{30} \cdot (\lambda_1^2 + \lambda_2^2 + \lambda_1^{-2} \cdot \lambda_2^{-2} - 3) \cdot (2\lambda_1 - 2\lambda_1^{-3} \cdot \lambda_2^{-2}) \cdot (2\lambda_1 - 2\lambda_1^{-3} \cdot \lambda_2^{-2}) \\
&\quad + 3C_{30} \cdot (\lambda_1^2 + \lambda_2^2 + \lambda_1^{-2} \cdot \lambda_2^{-2} - 3)^2 \cdot (2 + 6\lambda_1^{-4} \cdot \lambda_2^{-2}) \\
&\quad + \alpha \cdot [(\beta - 1)\lambda_1^{\beta-2} \cdot \lambda_2^\beta + (\beta + 1)\lambda_1^{-\beta-2}] \\
H_{22} &= C_{10} \cdot (2 + 6\lambda_1^{-2} \lambda_2^{-4}) + 2C_{20} \cdot (2\lambda_2 - 2\lambda_1^{-2} \cdot \lambda_2^{-3}) \cdot (2\lambda_2 - 2\lambda_1^{-2} \cdot \lambda_2^{-3}) \\
&\quad + 2C_{20} \cdot (\lambda_1^2 + \lambda_2^2 + \lambda_1^{-2} \cdot \lambda_2^{-2} - 3) \cdot (2 + 6\lambda_1^{-2} \cdot \lambda_2^{-4}) \\
&\quad + 6C_{30} \cdot (\lambda_1^2 + \lambda_2^2 + \lambda_1^{-2} \cdot \lambda_2^{-2} - 3) \cdot (2\lambda_2 - 2\lambda_1^{-2} \cdot \lambda_2^{-3}) \cdot (2\lambda_2 - 2\lambda_1^{-2} \cdot \lambda_2^{-3}) \\
&\quad + 3C_{30} \cdot (\lambda_1^2 + \lambda_2^2 + \lambda_1^{-2} \cdot \lambda_2^{-2} - 3)^2 \cdot (2 + 6\lambda_1^{-2} \cdot \lambda_2^{-4}) \\
&\quad + \alpha \cdot [(\beta - 1)\lambda_1^\beta \cdot \lambda_2^{\beta-2} + (\beta + 1)\lambda_2^{-\beta-2}] \\
H_{12} = H_{21} &= C_{10} \cdot (4\lambda_1^{-3} \lambda_2^{-3}) + 2C_{20} \cdot (2\lambda_2 - 2\lambda_1^{-2} \cdot \lambda_2^{-3}) \cdot (2\lambda_1 - 2\lambda_1^{-3} \cdot \lambda_2^{-2}) \\
&\quad + 2C_{20} \cdot (\lambda_1^2 + \lambda_2^2 + \lambda_1^{-2} \cdot \lambda_2^{-2} - 3) \cdot (4\lambda_1^{-3} \cdot \lambda_2^{-3}) \\
&\quad + 6C_{30} \cdot (\lambda_1^2 + \lambda_2^2 + \lambda_1^{-2} \cdot \lambda_2^{-2} - 3) \cdot (2\lambda_2 - 2\lambda_1^{-2} \cdot \lambda_2^{-3}) \cdot (2\lambda_1 - 2\lambda_1^{-3} \cdot \lambda_2^{-2}) \\
&\quad + 3C_{30} \cdot (\lambda_1^2 + \lambda_2^2 + \lambda_1^{-2} \cdot \lambda_2^{-2} - 3)^2 \cdot (4\lambda_1^{-3} \cdot \lambda_2^{-3}) \\
&\quad + \alpha \cdot (\beta \lambda_1^{\beta-1} \cdot \lambda_2^{\beta-1})
\end{aligned}$$

**Equation S2.** Components of the matrix  $\mathbf{D}$

$$\begin{aligned}
D_{11} &= [C_{10} \cdot (4\lambda_1 + 4\lambda_1^{-3} \lambda_2^{-2}) + 2C_{20} \cdot (2\lambda_1 - 2\lambda_1^{-3} \cdot \lambda_2^{-2}) \cdot (2\lambda_1^2 - 2\lambda_1^{-2} \cdot \lambda_2^{-2}) \\
&\quad + 2C_{20} \cdot (\lambda_1^2 + \lambda_2^2 + \lambda_1^{-2} \cdot \lambda_2^{-2} - 3) \cdot (4\lambda_1 + 4\lambda_1^{-3} \cdot \lambda_2^{-2}) \\
&\quad + 3C_{30} \cdot (\lambda_1^2 + \lambda_2^2 + \lambda_1^{-2} \cdot \lambda_2^{-2} - 3)^2 \cdot (4\lambda_1 + 4\lambda_1^{-3} \cdot \lambda_2^{-2}) \\
&\quad + 6C_{30} \cdot (\lambda_1^2 + \lambda_2^2 + \lambda_1^{-2} \cdot \lambda_2^{-2} - 3) \cdot (2\lambda_1 - 2\lambda_1^{-3} \cdot \lambda_2^{-2}) \cdot (2\lambda_1^2 - 2\lambda_1^{-2} \cdot \lambda_2^{-2}) \\
&\quad + \alpha \cdot (\beta \lambda_1^{\beta-1} \cdot \lambda_2^\beta + \beta \lambda_1^{-\beta-1})] \cdot \lambda_1 \\
D_{22} &= [C_{10} \cdot (4\lambda_2 + 4\lambda_1^{-2} \lambda_2^{-3}) + 2C_{20} \cdot (2\lambda_2 - 2\lambda_1^{-2} \cdot \lambda_2^{-3}) \cdot (2\lambda_2^2 - 2\lambda_1^{-2} \cdot \lambda_2^{-2}) \\
&\quad + 2C_{20} \cdot (\lambda_1^2 + \lambda_2^2 + \lambda_1^{-2} \cdot \lambda_2^{-2} - 3) \cdot (4\lambda_2 + 4\lambda_1^{-2} \cdot \lambda_2^{-3}) \\
&\quad + 3C_{30} \cdot (\lambda_1^2 + \lambda_2^2 + \lambda_1^{-2} \cdot \lambda_2^{-2} - 3)^2 \cdot (4\lambda_2 + 4\lambda_1^{-2} \cdot \lambda_2^{-3}) \\
&\quad + 6C_{30} \cdot (\lambda_1^2 + \lambda_2^2 + \lambda_1^{-2} \cdot \lambda_2^{-2} - 3) \cdot (2\lambda_2 - 2\lambda_1^{-2} \cdot \lambda_2^{-3}) \cdot (2\lambda_2^2 - 2\lambda_1^{-2} \cdot \lambda_2^{-2}) \\
&\quad + \alpha \cdot (\beta \lambda_1^\beta \cdot \lambda_2^{\beta-1} + \beta \lambda_2^{-\beta-1})] \cdot \lambda_2
\end{aligned}$$

$$\begin{aligned}
D_{12} = D_{21} = & C_{10} \cdot 4\lambda_1^{-2} \lambda_2^{-2} + 2C_{20} \cdot (2\lambda_2^2 - 2\lambda_1^{-2} \cdot \lambda_2^{-2}) \cdot (2\lambda_1^2 - 2\lambda_1^{-2} \cdot \lambda_2^{-2}) \\
& + 2C_{20} \cdot (\lambda_1^2 + \lambda_2^2 + \lambda_1^{-2} \cdot \lambda_2^{-2} - 3) \cdot (4\lambda_1^{-2} \cdot \lambda_2^{-2}) \\
& + 3C_{30} \cdot (\lambda_1^2 + \lambda_2^2 + \lambda_1^{-2} \cdot \lambda_2^{-2} - 3)^2 \cdot (4\lambda_1^{-2} \cdot \lambda_2^{-2}) \\
& + 6C_{30} \cdot (\lambda_1^2 + \lambda_2^2 + \lambda_1^{-2} \cdot \lambda_2^{-2} - 3) \cdot (2\lambda_2^2 - 2\lambda_1^{-2} \cdot \lambda_2^{-2}) \cdot (2\lambda_1^2 - 2\lambda_1^{-2} \cdot \lambda_2^{-2}) \\
& + \alpha \cdot (\beta \lambda_1^\beta \cdot \lambda_2^\beta)
\end{aligned}$$

**Equation S3.** Some constitutive models for comparison

1) Third-order Ogden model

$$\begin{aligned}
W &= \sum_{i=1}^3 \frac{2\mu_i}{\alpha_i^2} (\lambda_1^{\alpha_i} + \lambda_2^{\alpha_i} + \lambda_3^{\alpha_i} - 3) \\
T_{UT} &= \sum_{i=1}^n \frac{2\mu_i}{\alpha_i} \left( \lambda^{\alpha_i-1} - \lambda^{-\frac{\alpha_i-1}{2}} \right) \\
T_{ET} &= \sum_{i=1}^n \frac{2\mu_i}{\alpha_i} (\lambda^{\alpha_i-1} - \lambda^{-2\alpha_i-1}) \\
T_{PS} &= \sum_{i=1}^n \frac{2\mu_i}{\alpha_i} (\lambda^{\alpha_i-1} - \lambda^{-\alpha_i-1})
\end{aligned}$$

2) Alexander model

$$\begin{aligned}
W &= C_1 \int \exp \left[ k(I_1 - 3)^2 \right] dI_1 + C_2 \ln \left[ \frac{(I_2 - 3) + \gamma}{\gamma} \right] + C_3 (I_2 - 3) \\
T_{UT} &= 2 \bullet C_1 \bullet e^{\left[ k(I_1 - 3)^2 \right]} \bullet \left( \lambda - \frac{1}{\lambda^2} \right) + 2 \bullet \left[ \frac{C_2}{(I_2 - 3) + \gamma} + C_3 \right] \bullet \left( 1 - \frac{1}{\lambda^3} \right) \\
T_{ET} &= 2 \bullet C_1 \bullet e^{\left[ k(I_1 - 3)^2 \right]} \bullet \left( \lambda - \frac{1}{\lambda^5} \right) + 2 \bullet \left[ \frac{C_2}{(I_2 - 3) + \gamma} + C_3 \right] \bullet \left( \lambda^3 - \frac{1}{\lambda^3} \right) \\
T_{PS} &= 2 \bullet C_1 \bullet e^{\left[ k(I_1 - 3)^2 \right]} \bullet \left( \lambda - \frac{1}{\lambda^3} \right) + 2 \bullet \left[ \frac{C_2}{(I_2 - 3) + \gamma} + C_3 \right] \bullet \left( \lambda - \frac{1}{\lambda^3} \right)
\end{aligned}$$

3) Yeoh model

$$\begin{aligned}
W &= C_{10} (I_1 - 3) + C_{20} (I_1 - 3)^2 + C_{30} (I_1 - 3)^3 \\
T_{UT} &= 2 \bullet \left[ C_{10} + 2C_{20} \left( \lambda^2 + \frac{2}{\lambda} - 3 \right) + 3C_{30} \left( \lambda^2 + \frac{2}{\lambda} - 3 \right)^2 \right] \bullet \left( \lambda - \frac{1}{\lambda^2} \right) \\
T_{ET} &= 2 \bullet \left[ C_{10} + 2C_{20} \left( 2\lambda^2 + \frac{1}{\lambda^4} - 3 \right) + 3C_{30} \left( 2\lambda^2 + \frac{1}{\lambda^4} - 3 \right)^2 \right] \bullet \left( \lambda - \frac{1}{\lambda^5} \right) \\
T_{PS} &= 2 \bullet \left[ C_{10} + 2C_{20} \left( \lambda^2 + \frac{1}{\lambda^2} - 2 \right) + 3C_{30} \left( \lambda^2 + \frac{1}{\lambda^2} - 2 \right)^2 \right] \bullet \left( \lambda - \frac{1}{\lambda^3} \right)
\end{aligned}$$

4) Melly model

$$\begin{aligned}
 W &= C_{10} (I_1 - 3) + C_{20} (I_1 - 3)^2 + C_{30} (I_1 - 3)^3 + D(\sqrt{I_2} - \sqrt{3}) \\
 T_{UT} &= 2 \bullet \left[ C_{10} + 2C_{20} \left( \lambda^2 + \frac{2}{\lambda} - 3 \right) + 3C_{30} \left( \lambda^2 + \frac{2}{\lambda} - 3 \right)^2 \right] \left( \lambda - \frac{1}{\lambda^2} \right) + D \bullet \left( \frac{1}{\lambda^2} + 2\lambda \right)^{-\frac{1}{2}} \bullet \left( 1 - \frac{1}{\lambda^3} \right) \\
 T_{ET} &= 2 \bullet \left[ C_{10} + 2C_{20} \left( 2\lambda^2 + \frac{1}{\lambda^4} - 3 \right) + 3C_{30} \left( 2\lambda^2 + \frac{1}{\lambda^4} - 3 \right)^2 \right] \left( \lambda - \frac{1}{\lambda^5} \right) + D \bullet \left( \frac{2}{\lambda^2} + \lambda^4 \right)^{-\frac{1}{2}} \bullet \left( \lambda^3 - \frac{1}{\lambda^3} \right) \\
 T_{PS} &= 2 \bullet \left[ C_{10} + 2C_{20} \left( \lambda^2 + \frac{1}{\lambda^2} - 2 \right) + 3C_{30} \left( \lambda^2 + \frac{1}{\lambda^2} - 2 \right)^2 \right] \left( \lambda - \frac{1}{\lambda^3} \right) + D \bullet \left( \frac{1}{\lambda^2} + \lambda^2 + 1 \right)^{-\frac{1}{2}} \bullet \left( \lambda - \frac{1}{\lambda^3} \right)
 \end{aligned}$$

5) Modified Yeoh model

$$\begin{aligned}
 W &= C_{10} (I_1 - 3) + C_{20} (I_1 - 3)^2 + C_{30} (I_1 - 3)^3 + \frac{\alpha}{\beta} (1 - e^{-\beta(I_1 - 3)}) \\
 T_{UT} &= 2 \bullet \left[ C_{10} + 2C_{20} \left( \lambda^2 + \frac{2}{\lambda} - 3 \right) + 3C_{30} \left( \lambda^2 + \frac{2}{\lambda} - 3 \right)^2 + \alpha \bullet e^{-\beta \left( \lambda^2 + \frac{2}{\lambda} - 3 \right)} \right] \left( \lambda - \frac{1}{\lambda^2} \right) \\
 T_{ET} &= 2 \bullet \left[ C_{10} + 2C_{20} \left( 2\lambda^2 + \frac{1}{\lambda^4} - 3 \right) + 3C_{30} \left( 2\lambda^2 + \frac{1}{\lambda^4} - 3 \right)^2 + \alpha \bullet e^{-\beta \left( 2\lambda^2 + \frac{1}{\lambda^4} - 3 \right)} \right] \left( \lambda - \frac{1}{\lambda^5} \right) \\
 T_{PS} &= 2 \bullet \left[ C_{10} + 2C_{20} \left( \lambda^2 + \frac{1}{\lambda^2} - 2 \right) + 3C_{30} \left( \lambda^2 + \frac{1}{\lambda^2} - 2 \right)^2 + \alpha \bullet e^{-\beta \left( \lambda^2 + \frac{1}{\lambda^2} - 2 \right)} \right] \left( \lambda - \frac{1}{\lambda^3} \right)
 \end{aligned}$$

6) Generalized Yeoh model

$$\begin{aligned}
 W &= K_1 (I_1 - 3)^m + K_2 (I_1 - 3)^p + K_3 (I_1 - 3)^q \\
 T_{UT} &= 2 \bullet \left( \lambda - \frac{1}{\lambda^2} \right) \bullet \left[ K_1 \bullet m \bullet \left( \lambda^2 + \frac{2}{\lambda} - 3 \right)^{m-1} + K_2 \bullet p \bullet \left( \lambda^2 + \frac{2}{\lambda} - 3 \right)^{p-1} + K_3 \bullet q \bullet \left( \lambda^2 + \frac{2}{\lambda} - 3 \right)^{q-1} \right] \\
 T_{ET} &= 2 \bullet \left( \lambda - \frac{1}{\lambda^5} \right) \bullet \left[ K_1 \bullet m \bullet \left( 2\lambda^2 + \frac{1}{\lambda^4} - 3 \right)^{m-1} + K_2 \bullet p \bullet \left( 2\lambda^2 + \frac{1}{\lambda^4} - 3 \right)^{p-1} + K_3 \bullet q \bullet \left( 2\lambda^2 + \frac{1}{\lambda^4} - 3 \right)^{q-1} \right] \\
 T_{PS} &= 2 \bullet \left( \lambda - \frac{1}{\lambda^3} \right) \bullet \left[ K_1 \bullet m \bullet \left( \lambda^2 + \frac{1}{\lambda^2} - 2 \right)^{m-1} + K_2 \bullet p \bullet \left( \lambda^2 + \frac{1}{\lambda^2} - 2 \right)^{p-1} + K_3 \bullet q \bullet \left( \lambda^2 + \frac{1}{\lambda^2} - 2 \right)^{q-1} \right]
 \end{aligned}$$

7) Anssari-Benam model

$$\begin{aligned}
 W &= \frac{3(n-1)}{2n} \mu N \left[ \frac{1}{3N(n-1)} (I_1 - 3) - \ln \left( \frac{I_1 - 3N}{3 - 3N} \right) \right] \\
 T_{UT} &= \frac{1}{\lambda} \bullet \left\{ \frac{\mu}{n} \left( \frac{\lambda^2 + 2\lambda^{-1} - 3nN}{\lambda^2 + 2\lambda^{-1} - 3N} \right) \left( \lambda^2 - \frac{1}{\lambda} \right) \right\}
 \end{aligned}$$

$$T_{ET} = \frac{1}{\lambda} \bullet \left\{ \frac{\mu}{n} \left( \frac{2\lambda^2 + \lambda^{-4} - 3nN}{2\lambda^2 + \lambda^{-4} - 3N} \right) \left( \lambda^2 - \frac{1}{\lambda^4} \right) \right\}$$

$$T_{PS} = \frac{1}{\lambda} \bullet \left\{ \frac{\mu}{n} \left( \frac{\lambda^2 + \lambda^{-2} + 1 - 3nN}{\lambda^2 + \lambda^{-2} + 1 - 3N} \right) \left( \lambda^2 - \frac{1}{\lambda^2} \right) \right\}$$

8) Modified Anssari-Benam model

$$W = \frac{3(n-1)}{2n} \mu N \left[ \frac{1}{3N(n-1)} (I_1 - 3) - \ln \left( \frac{I_1 - 3N}{3 - 3N} \right) \right] + \frac{\alpha}{\beta} \left[ (\lambda_1 \lambda_2)^\beta + (\lambda_2 \lambda_3)^\beta + (\lambda_1 \lambda_3)^\beta - 3 \right]$$

$$T_{UT} = \frac{1}{\lambda} \bullet \left\{ \frac{\mu}{n} \left( \frac{\lambda^2 + 2\lambda^{-1} - 3nN}{\lambda^2 + 2\lambda^{-1} - 3N} \right) \left( \lambda^2 - \frac{1}{\lambda} \right) + \alpha \bullet \left( \lambda^{\frac{\beta}{2}} - \lambda^{-\beta} \right) \right\}$$

$$T_{ET} = \frac{1}{\lambda} \bullet \left\{ \frac{\mu}{n} \left( \frac{2\lambda^2 + \lambda^{-4} - 3nN}{2\lambda^2 + \lambda^{-4} - 3N} \right) \left( \lambda^2 - \frac{1}{\lambda^4} \right) + \alpha \bullet \left( \lambda^{2\beta} - \lambda^{-\beta} \right) \right\}$$

$$T_{PS} = \frac{1}{\lambda} \bullet \left\{ \frac{\mu}{n} \left( \frac{\lambda^2 + \lambda^{-2} + 1 - 3nN}{\lambda^2 + \lambda^{-2} + 1 - 3N} \right) \left( \lambda^2 - \frac{1}{\lambda^2} \right) + \alpha \bullet \left( \lambda^\beta - \lambda^{-\beta} \right) \right\}$$
